# Supplementary material
Source: PubMed Central journal article supplement (PMC9177569)
Supplement: NIHMS1782115-supplement-supinfo.pdf [file NIHMS1782115-supplement-supinfo.pdf]

**Supplementary Table S1: ICD Codes for Mild Cognitive Impairment and Dementia**

| ICD-9 codes |                                                                            | ICD-10 codes |                                                                                                                     |
|-------------|----------------------------------------------------------------------------|--------------|---------------------------------------------------------------------------------------------------------------------|
| Code        | Diagnosis                                                                  | Code         | Diagnosis                                                                                                           |
| 331.83      | Mild Cognitive Impairment                                                  | G31.84       | Mild Cognitive Impairment                                                                                           |
|             | Any Dementia as any code below                                             |              | Any Dementia as any code below                                                                                      |
| 290.0       | Senile dementia, uncomplicated                                             | F03.90       | Unspecified dementia without behavioral disturbance                                                                 |
| 290.10      | Presenile dementia uncomplicated                                           |              |                                                                                                                     |
| 290.11      | Presenile dementia with delirium                                           |              |                                                                                                                     |
| 290.12      | Presenile dementia with delusional features                                |              |                                                                                                                     |
| 290.13      | Presenile dementia with depression                                         |              |                                                                                                                     |
| 290.20      | Senile dementia with delusional features                                   |              |                                                                                                                     |
| 290.21      | Senile dementia with depressive features                                   |              |                                                                                                                     |
| 290.3       | Senile delirium                                                            |              |                                                                                                                     |
| 290.40      | Vascular dementia, uncomplicated                                           | F01.50       | Vascular dementia without behavioral disturbance                                                                    |
| 290.41      | Vascular dementia, with delirium                                           | F01.51       | Vascular dementia with behavioral disturbance                                                                       |
| 290.42      | Vascular dementia, with delusions                                          |              |                                                                                                                     |
| 290.43      | Vascular dementia with depression                                          |              |                                                                                                                     |
| 291.2       | Alcohol-induced persisting dementia                                        | F10.27       | Alcohol dependence with alcohol-induced persisting dementia                                                         |
|             |                                                                            | F10.97       | Alcohol use, unspecified with alcohol-induced persisting dementia                                                   |
| 292.8       | Drug-Induced Persisting Dementia                                           | F13.27       | Sedative, hypnotic or anxiolytic dependence with sedative, hypnotic or anxiolytic-induced persisting dementia       |
|             |                                                                            | F13.97       | Sedative, hypnotic or anxiolytic use, unspecified with sedative, hypnotic or anxiolytic-induced persisting dementia |
|             |                                                                            | F18.17       | Inhalant abuse with inhalant-induced dementia                                                                       |
|             |                                                                            | F18.27       | Inhalant dependence with inhalant-induced dementia                                                                  |
|             |                                                                            | F18.97       | Inhalant use, unspecified with inhalant-induced persisting dementia                                                 |
|             |                                                                            | F19.17       | Other psychoactive substance abuse with psychoactive substance-induced persisting dementia                          |
|             |                                                                            | F19.27       | Other psychoactive substance dependence with psychoactive substance-induced persisting dementia                     |
|             |                                                                            | F19.97       | Other psychoactive substance use, unspecified with psychoactive substance-induced persisting dementia               |
| 294.10      | Dementia in conditions classified elsewhere without behavioral disturbance | F02.80       | Dementia in other diseases classified elsewhere without behavioral disturbance                                      |

|        |                                                                         |        |                                                                                                    |
|--------|-------------------------------------------------------------------------|--------|----------------------------------------------------------------------------------------------------|
| 294.11 | Dementia in conditions classified elsewhere with behavioral disturbance | F02.81 | Dementia in other diseases classified elsewhere with behavioral disturbance                        |
| 294.20 | Dementia, unspecified without behavioral disturbance                    | F03.90 | Unspecified dementia without behavioral disturbance                                                |
| 294.21 | Dementia, unspecified, with behavioral disturbance                      | F03.91 | Unspecified dementia without behavioral disturbance; delirium due to known physiological condition |
| 331.0  | Alzheimer's disease                                                     | G30.0  | Alzheimer's disease with early onset                                                               |
|        |                                                                         | G30.1  | Alzheimer's disease with late onset                                                                |
|        |                                                                         | G30.8  | Other Alzheimer's disease                                                                          |
|        |                                                                         | G30.9  | Alzheimer's disease, unspecified                                                                   |
| 331.11 | Pick's disease                                                          | G31.01 | Pick's disease                                                                                     |
| 331.19 | Other frontotemporal dementia                                           | G31.09 | Other frontotemporal dementia                                                                      |
| 331.82 | Dementia with Lewy body's                                               | G31.83 | Dementia with Lewy body's                                                                          |
| 046.11 | Variant creutzfeldt-jakob disease                                       | A81.00 | Creutzfeldt-jakob disease, unspecified                                                             |
| 046.19 | Other and unspecified creutzfeldt-jakob disease                         | A81.01 | Variant creutzfeldt-jakob disease                                                                  |
|        |                                                                         | A81.09 | Other creutzfeldt-jakob disease                                                                    |
| 046.3  | Progressive multifocal leukoencephalopathy                              | A81.2  | Progressive multifocal leukoencephalopathy                                                         |
| 046.79 | Other and unspecified prion disease of central nervous system           |        |                                                                                                    |
